# Supplementary material
Source: HighWire-hosted journal article supplement (https://jitc.bmj.com/content/13/3/e010639)

**Protein Arginine Methyltransferase 6 Enhances Immune Checkpoint Blockade Efficacy via the STING pathway in MMR-Proficient Colorectal Cancer**

Jinlin Duan, Tao Chen, Qiwei Li, Yu Zhang, Ting Lu, Junyan Xue, Yang Sun\*, Ling Gao\*, Yonglong Zhang\*

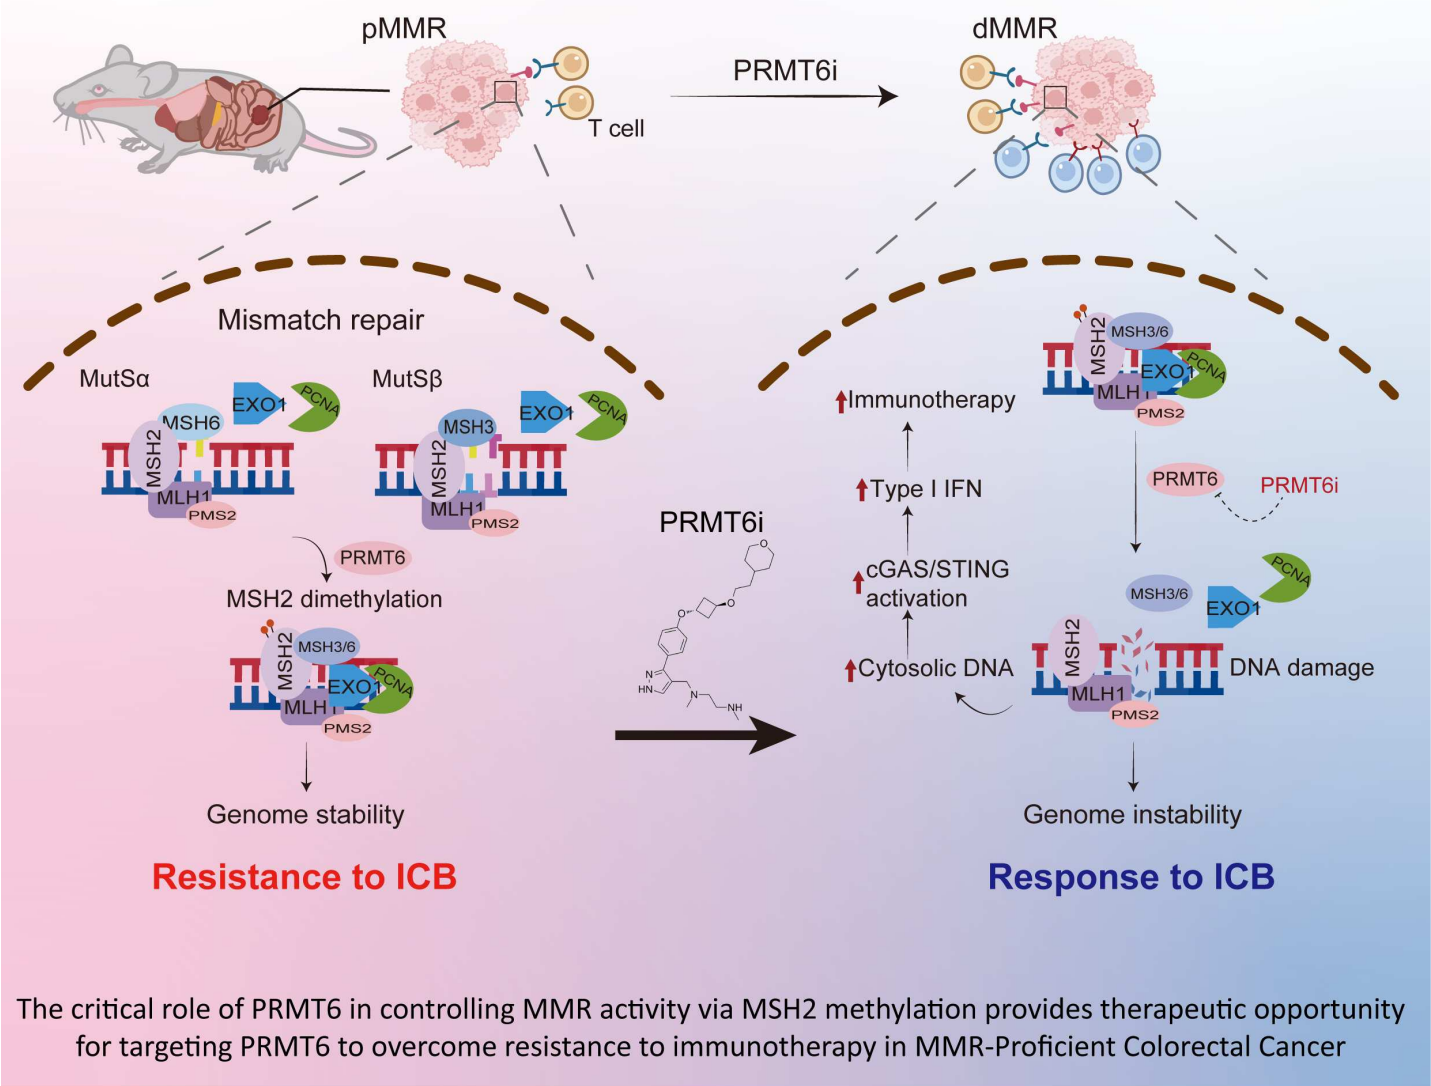

Supplement: inline-supplementary-material-2 [file inline-supplementary-material-2.pdf]
